# Supplementary material for: Demonstration of green hydrogen production using solar energy at 28% efficiency and evaluation of its economic viability
Source: Royal Society of Chemistry journal article supplement (doi:10.1039/d0se01761b), 2021-01-01
Supplement: d0se01761b1.pdf [file d0se01761b1.pdf]

## **Supporting Information**

### **Demonstration of green hydrogen production using solar energy at 28% efficiency and evaluation of its economic viability**

M.A. Khan<sup>+</sup>, I. Al-Shankiti, A. Ziani and H. Idriss<sup>+</sup>

Hydrogen Platform, SABIC-CRD, King Abdullah University of Science and Technology (KAUST),  
Thuwal 23955, Saudi Arabia

<sup>+</sup>Electronic mail: [mohd.khan1@ucalgary.ca](mailto:mohd.khan1@ucalgary.ca); [IdrissH@SABIC.com](mailto:IdrissH@SABIC.com)

Additional details of the TEA for making hydrogen (50 tons/ day) from water using CPV-E for 9.1 hours per day and direct electrolysis (from the grid) for 14.9 hours per day.

### Capital and Working Parameters

|                                                   |        |
|---------------------------------------------------|--------|
| plant lifetime (years)                            | 20     |
| H <sub>2</sub> Production (ton/day)               | 50     |
| Sunshine (hours/day)                              | 9.1    |
| Night hours (hours/day)                           | 14.9   |
| H <sub>2</sub> Production Rate during day (ton/h) | 2.08   |
| H <sub>2</sub> produced by PV (ton/day)           | 18.96  |
| H <sub>2</sub> produced by electricity (ton/day)  | 31.04  |
| Annual Working Days (days/yr)                     | 333    |
| H <sub>2</sub> Production Rate from PV (ton/year) | 6313.7 |
| Total H <sub>2</sub> Production Rate (ton/year)   | 16150  |

### PV Energy & land

|                                                             |                  |
|-------------------------------------------------------------|------------------|
| PV lifetime (years)                                         | 20               |
| Land factor                                                 | 4                |
| Power needed for Solar Farm (kW)                            | 97,202.38        |
| Energy produced by solar farm (kWh)                         | 884,541.67       |
| Solar Irradiation in Tabuk KSA (kWh/m <sup>2</sup> )        | 7.37             |
| PV module efficiency                                        | 41.00%           |
| Power produced by PV module (kWh/m <sup>2</sup> )           | 3.022            |
| Area needed by PV modules (m <sup>2</sup> )                 | 2.93E+05         |
| Total area required (m <sup>2</sup> ) including land factor | 1.17E+06         |
| module and tracker lifetime (years)                         | 25.00            |
| Module and tracker cost (\$/W)                              | \$ 0.720         |
| Labor, Design, and installation (\$/W)                      | \$0.43           |
| PV inverter (\$/W)                                          | \$0.08           |
| Total Module and tracker cost (\$)                          | \$69,985,714.29  |
| Total cost of Labor, design, permitting and installation    | \$41,991,428.57  |
| PV inverter cost (\$)                                       | \$7,776,190.48   |
| PV Farm turnkey Capital                                     | \$119,753,333.33 |
| PV O&M cost (USD/kWh)                                       | 0.008            |
| PV annual Opex                                              | \$7,076.33       |

**Electrolyzer (Alkaline)**

|                                                                                           |                 |
|-------------------------------------------------------------------------------------------|-----------------|
| Reference Operating current density (A/cm <sup>2</sup> )                                  | 0.40            |
| Reference Operating voltage (V)                                                           | 1.70            |
| Actual operating current density                                                          | 0.40            |
| Pressure of H <sub>2</sub> (bar) before compression                                       | 10              |
| electrical usage per kg of H <sub>2</sub> (KWh <sub>elec</sub> /kg(H <sub>2</sub> )) -LHV | 32.66           |
| Electrolysis efficiency (electrical efficiency) (1.23/1.7)                                | 0.70            |
| Fixed O&M (%) - of total uninstalled CAPEX                                                | 3.00%           |
| Electrolyzer replacement cost (% of uninstalled capex)                                    | 15.00%          |
| Stack Cost of reference electrolyzer (USD/kW)                                             | \$272.00        |
| Balance of plant capital cost includes power electronics (USD/kW)                         | \$272.00        |
| Electrolyzer installation factor                                                          | 12.0%           |
| Reference Stack cost (\$/m <sup>2</sup> )                                                 | 1849.60         |
| H <sub>2</sub> production (mol/day)                                                       | 2.50E+07        |
| electrons to make 1 H <sub>2</sub> molecule                                               | 2.00            |
| electrons to make 1 mole of H <sub>2</sub>                                                | 1.20E+24        |
| total electrons needed per day (electrons/day)                                            | 3.01E+31        |
| total charge (C /day)                                                                     | 4.82E+12        |
| Amps (C / second)                                                                         | 5.58E+07        |
| Area of electrolyzer (cm <sup>2</sup> )                                                   | 1.39E+08        |
| Area of electrolyser (m <sup>2</sup> )                                                    | 13942.13        |
| stack cost of electrolyser based on m <sup>2</sup> (USD)                                  | \$25,787,362.96 |
| BOP cost (USD)                                                                            | \$25,787,362.96 |
| installation cost of electrolyser (USD)                                                   | \$6,188,967.11  |
| Capex of electrolyzer stack, BOS & installation (USD)                                     | \$57,763,693.04 |
| Yearly Opex of electrolyzer (\$/year)                                                     | \$1,547,241.78  |
| Yearly electricity cost of (\$/year)                                                      | \$9,645,781.07  |
| Electrode replacement time (years)                                                        | 7.00            |
| number of times electrodes will be replaced in plant lifetime                             | 2.00            |
| Electrolyzer replacement factor                                                           | 1.5%            |
| annual electrolyzer replacement cost (USD/yr)                                             | \$866,455.40    |
| Electrolyzer annual Opex (USD/yr)                                                         | \$2,413,697.17  |

**Water pump, Compressor gas processing (to 20 bar)**

|                       |                |
|-----------------------|----------------|
| Duty(kW)              | 51.94          |
| Capex of pump         | \$29,306.58    |
| Opex (USD/yr) of pump | \$8,302.09     |
| Duty (kW)             | 984.68         |
| Opex (USD/hr)         | \$19.69        |
| Capex (USD)           | \$4,143,572.97 |
| Opex (USD/yr)         | \$157,391.09   |

### Production using electricity

|                                                         |              |
|---------------------------------------------------------|--------------|
| H <sub>2</sub> Production Rate (ton/h)                  | 2.08         |
| working hours/day                                       | 14.9         |
| Power needed from grid (kW)                             | 97202.38     |
| Energy provided by grid (kWh)                           | 1,448,315.48 |
| Total system electrical usage at night for a year (kWh) | 4.82E+08     |

### Factors

|                                          |              |
|------------------------------------------|--------------|
| KSA Location Markup Factor (1.0 for USA) | 1.00         |
| Land cost (USD/km <sup>2</sup> )         | \$123,497.00 |
| H <sub>2</sub> loss due to separation    | 3.0%         |

### Operation Parameters

|                                                             |                |
|-------------------------------------------------------------|----------------|
| DI Water amount (ton/tonH <sub>2</sub> )                    | 10             |
| DI Water price (USD/ton)                                    | 1.3            |
| Annual water consumption (ton/yr)                           | 166,500.00     |
| Annual water cost (USD/yr)                                  | \$216,450.00   |
| Required electricity for utilities (kWh/tonH <sub>2</sub> ) | 161.00         |
| Annual electricity requirement for utilities (kWh/yr)       | 2,680,650.00   |
| Electricity price (USD/kWh)                                 | 0.02           |
| Annual electricity cost (USD/yr)                            | \$53,613.00    |
| Number Plant Staff                                          | 10             |
| Staff salary cost (USD/h)                                   | 20.00          |
| Annual cost of plant staff (USD/yr)                         | \$1,598,400.00 |

### Revenue

|                                                                                                                                                                                                                  |                 |
|------------------------------------------------------------------------------------------------------------------------------------------------------------------------------------------------------------------|-----------------|
| Levelized H <sub>2</sub> Price (USD/ton)                                                                                                                                                                         | \$2,555         |
| Annual H <sub>2</sub> revenue (USD/yr)                                                                                                                                                                           | \$41,257,830.32 |
| Oxygen Credit (USD/ton O <sub>2</sub> )                                                                                                                                                                          | \$40.00         |
| Oxygen Credit (USD/ton H <sub>2</sub> )                                                                                                                                                                          | \$320.00        |
| Annual Oxygen Credit (USD)                                                                                                                                                                                       | \$5,168,160.00  |
| CO <sub>2</sub> Credit (USD/ton CO <sub>2</sub> )<br>based on stoichiometric ratio of the SMR reaction<br>(CH <sub>4</sub> + 2H <sub>2</sub> O → 4H <sub>2</sub> + CO <sub>2</sub> ) – excluding process energy. | \$50.00         |
| CO <sub>2</sub> Credit (USD/ton H <sub>2</sub> )                                                                                                                                                                 | \$275.00        |
| Annual CO <sub>2</sub> Credit (USD)                                                                                                                                                                              | \$4,441,387.50  |

**Total Capex**

|                                                            |                  |
|------------------------------------------------------------|------------------|
| PV Farm turnkey Capital                                    | \$119,753,333.33 |
| Capex of electrolyzer stack, BOS & installation (USD)      | \$57,763,693.04  |
| Compressor & gas processing (USD)                          | \$4,143,572.97   |
| Water pump                                                 | \$29,306.58      |
| Fixed Capital Cost (USD)                                   | \$181,689,905.92 |
| Contingency                                                | 20.0%            |
| Total Fixed Capital Cost in KSA + plus contingency (USD)   | \$218,027,887.10 |
| Land Cost (USD)                                            | \$146,326.82     |
| Working capital - (Installation Cost of whole plant) (USD) | \$48,180,395.68  |

**Annual Opex**

|                                                            |                 |
|------------------------------------------------------------|-----------------|
| Annual PV Maintenance (USD/yr)                             | \$7,076.33      |
| O&M of electrolyzer (USD/yr)                               | \$2,413,697.17  |
| Electricity cost to run electrolyzer + utilities (\$/year) | \$9,699,394.07  |
| Compressor                                                 | \$157,391.09    |
| Water pump                                                 | \$8,302.09      |
| Annual water cost (USD/yr)                                 | \$216,450.00    |
| Annual staff cost (USD/yr)                                 | \$ 1,598,400.00 |
| Total Annual Variable Cost (USD/yr) (OPEX)                 | \$14,100,710.76 |

**Revenue**

|                                        |                  |
|----------------------------------------|------------------|
| Annual H <sub>2</sub> Revenue          | \$41,257,830.32  |
| annual oxygen + CO <sub>2</sub> credit | \$9,609,547.50   |
| Total Annual Revenue (USD/yr)          | \$ 50,867,377.82 |

|                                     |              |
|-------------------------------------|--------------|
| <b>Internal Rate of Return: IRR</b> | <b>12.0%</b> |
|-------------------------------------|--------------|

**Effect of operation time and electricity cost on the Levelized Cost of Hydrogen from water.**

| 50 tons H <sub>2</sub> /day                    | CPV (9.1 hour operation) | CPV + grid (24 hour operation) Electricity at 0.05 \$/kWh | CPV + grid (24 hour operation) Electricity at 0.02 \$/kWh |
|------------------------------------------------|--------------------------|-----------------------------------------------------------|-----------------------------------------------------------|
| <b>Energy provided and power needed</b>        |                          |                                                           |                                                           |
| <b>Power needed for the solar farm (kW)</b>    | 256,357.93               | 97,202.38                                                 | 97,202.38                                                 |
| <b>Energy provided by the solar farm (kWh)</b> | 2,332,857.14             | 884,541.67                                                | 884,541.67                                                |
| <b>Energy provided by grid (kWh)</b>           | 0                        | 1,448,315.48                                              | 1,448,315.48                                              |
| <b>Capex</b>                                   |                          |                                                           |                                                           |
| <b>Total solar farm cost (\$)</b>              | \$315,832,967.03         | \$119,753,333.33                                          | \$119,753,333.33                                          |
| <b>Total electrolysers capital (\$)</b>        | \$156,193,758.24         | \$57,763,693.04                                           | \$57,763,693.04                                           |
| <b>Opex</b>                                    |                          |                                                           |                                                           |
| <b>Annual PV Maintenance (\$/yr)</b>           | \$18,662.86              | \$7,076.33                                                | \$7,076.33                                                |
| <b>Annual electricity cost (\$/yr)</b>         | \$134,032.50             | \$24,248,485.18                                           | \$9,699,394.07                                            |
| <b>Levelized H<sub>2</sub> Price (\$/ton)</b>  | \$5,900                  | \$3,471                                                   | \$2,555                                                   |

At 0.05 \$/kWh the LCH is found to be \$3.47 the kg (a drop of \$2.5 per kg when compared to a 9.1 hours/day operation). The effect of electricity, while important, seems to affect less the cost in the investigated range, a drop of \$0.9 per kg<sub>H2</sub> (ca. 25%) when the electricity dropped 2.5 times (from \$0.05 to \$0.02 the kWh; a 250% drop).

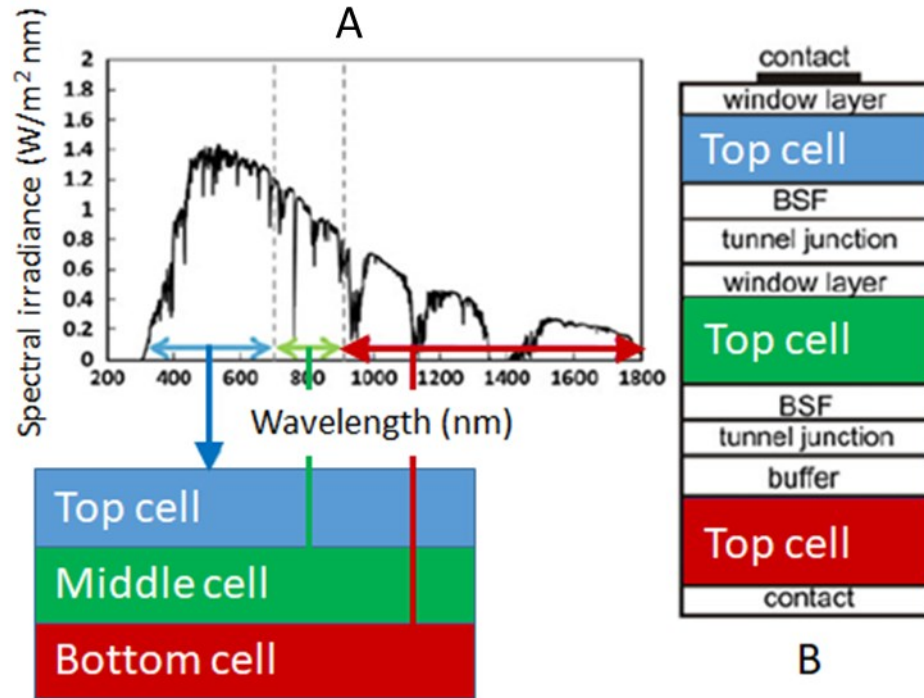

Figure S1. Part of the solar spectrum absorbed in a triple junction solar cell (A) and a schematic representation of a typical triple-junction solar cell (B) (adapted from ref. 1)

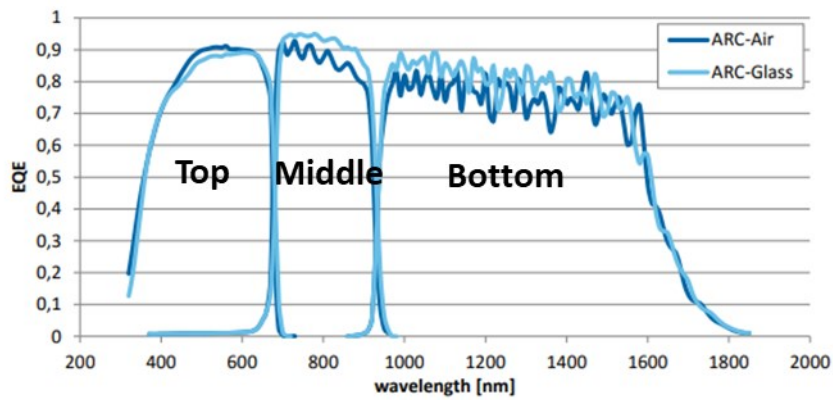

Figure S2. External quantum efficiency (EQE) of a GaInP/GaInAs/Ge AzurSpace solar cell (adapted from ref. 2).

### **References**

- 1) Fernández, Eduardo F., Antonio J. García-Loureiro, and Greg P. Smestad. "Multijunction concentrator solar cells: analysis and fundamentals." High Concentrator Photovoltaics. Springer, Cham, 2015. 9-37.
- 2) [http://www.azurspace.com/images/products/0004357-00-01\\_3C44\\_AzurDesign\\_3x3.pdf](http://www.azurspace.com/images/products/0004357-00-01_3C44_AzurDesign_3x3.pdf)
